# Supplementary material for: Characterization of a membrane-bound C-glucosyltransferase responsible for carminic acid biosynthesis in Dactylopius coccus Costa
Source: PubMed Central journal article supplement (PMC5719414; doi:10.1038/s41467-017-02031-z), 2017-12-07
Supplement: 41467_2017_2031_MOESM1_ESM.pdf [file 41467_2017_2031_MOESM1_ESM.pdf]

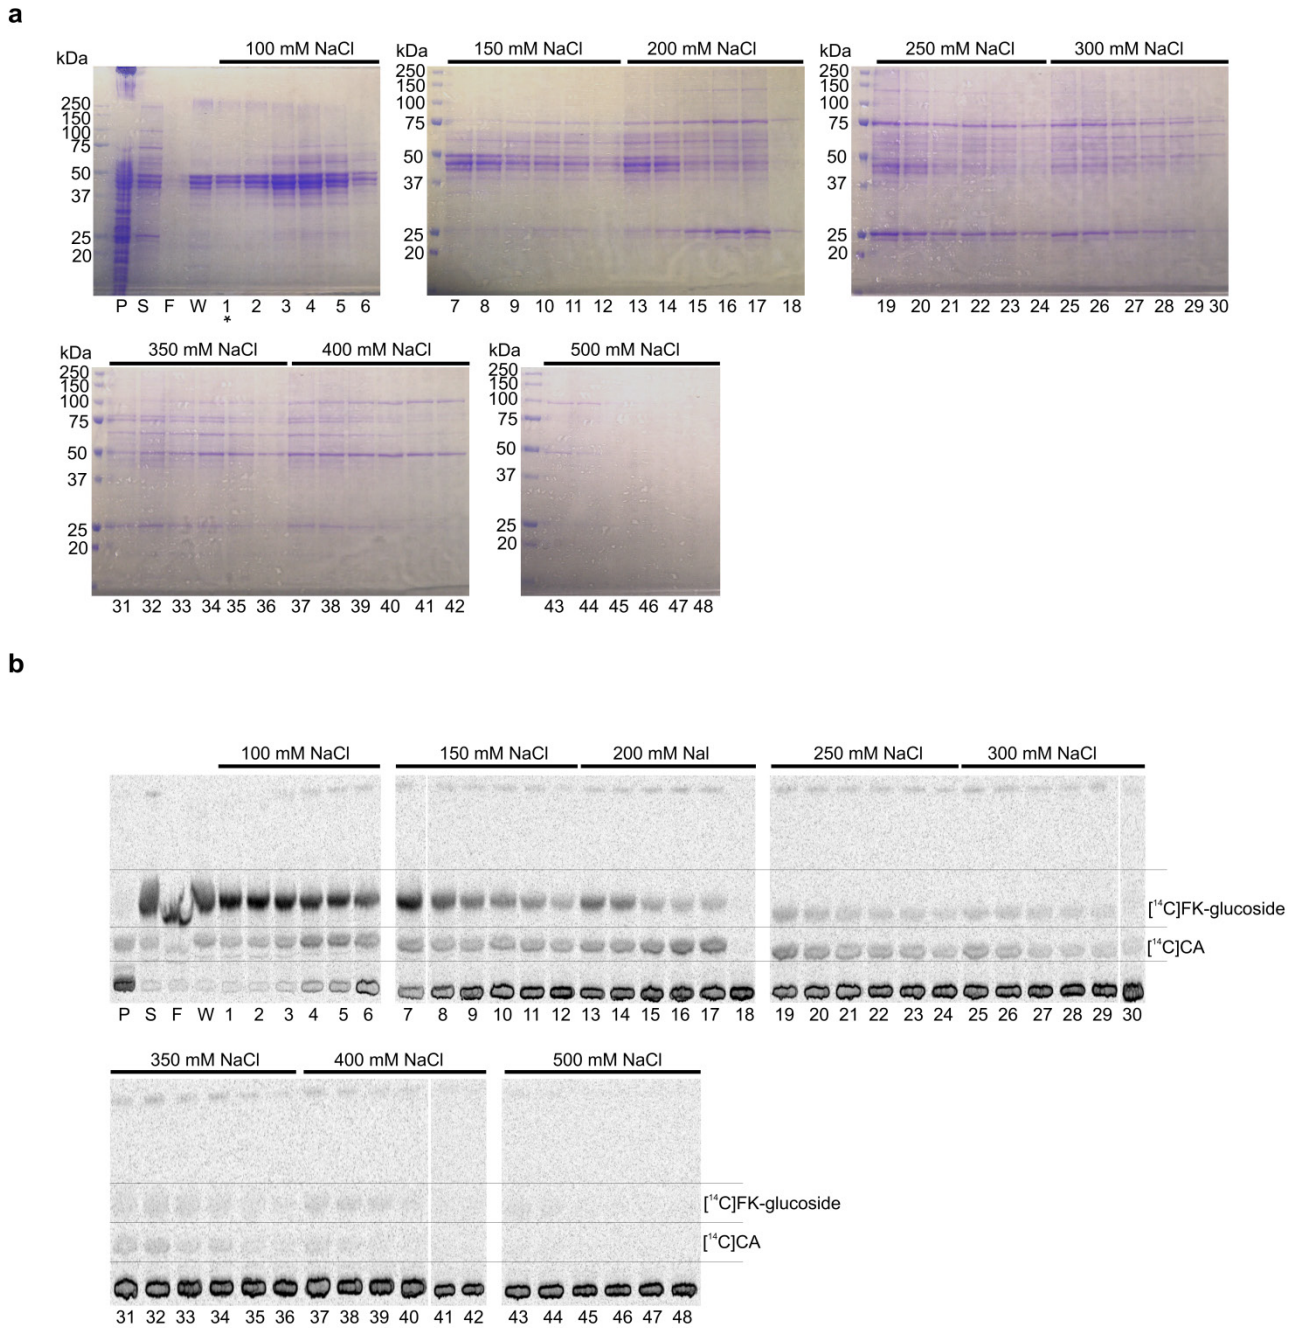

**Supplementary Figure 1 | Partial purification of a *D. coccus* FK/KA-specific glucosylation activity** *D. coccus* microsomes were solubilized using reduced Triton X-100 and fractionated by anion-exchange chromatography using Q-Sepharose. Proteins were eluted using a discontinues NaCl gradient from 100 mM-500 mM. Forty-eight eluted fractions were collected together with a pellet (P: Reduced Triton X-100 insoluble protein fraction), a solubilized (S: Reduced Triton X-100 soluble protein fraction), a flow-through (F: Proteins that did not bind to the Q-Sepharose) and a wash fraction (W: Proteins washed off the column with 50 mM NaCl). All protein fractions were tested for glucosylation activity *in vitro* using the flavokermesic acid aglucone and the [<sup>14</sup>C]UDP-glucose donor. **a** Coomassie-stained SDS gels of separated protein fractions. **b** TLC-separated [<sup>14</sup>C] products formed *in vitro* and viewed by phosphorimaging. FK: flavokermesic acid; CA: carminic acid; Asterisk indicates the protein fraction that was analyzed further by proteomics (Fig. 3). The positions of [<sup>14</sup>C]FK-glucoside and [<sup>14</sup>C]CA are indicated. The *in vitro* formation of [<sup>14</sup>C]CA was ascribed to the conversion of kermesic acid that still was bound to the *D. coccus* microsomes despite numerous wash steps during preparation.

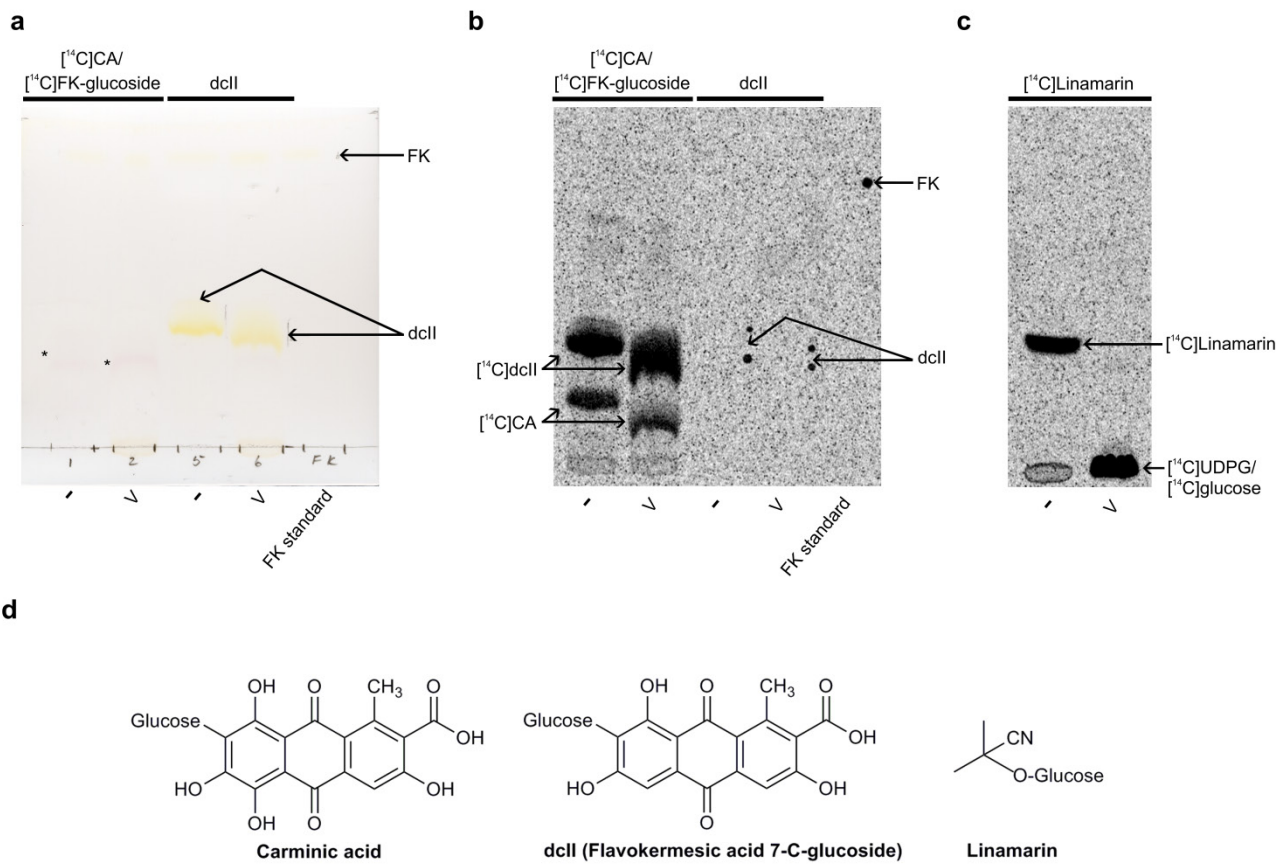

**Supplementary Figure 2 | Enzymatic verification of *in vitro*-produced dcll and carminic acid [<sup>14</sup>C] products, formed *in vitro* by incubating *D. coccus* microsomes with the flavokermesic acid aglucone and the [<sup>14</sup>C]UDP-glucose donor, were isolated and either non-treated (-) or treated with viscozyme (V). Non-radioactive dcll and [<sup>14</sup>C]Linamarin, representing a C-glucoside and an O-glucoside, respectively were used as controls for the viscozyme -treatment. **a** TLC plate of separated radioactive and non-radioactive compounds after treatment without or with viscozyme. **b** TLC plate from panel (a) viewed by phosphorimaging. **c** [<sup>14</sup>C]Linamarin treated without or with viscozyme followed by TLC-separation and phosphorimaging. **d** Chemical structures of the glucosides treated without or with viscozyme. Asterisk indicates carminic acid that still was bound to the *D. coccus* microsomes despite numerous wash steps during preparation. Likewise, the *in vitro* formation of [<sup>14</sup>C]CA was ascribed to the conversion of kermesic acid that also still was associated to the *D. coccus* microsomes. FK: flavokermesic acid; CA: carminic acid; [<sup>14</sup>C]UDPG: [<sup>14</sup>C]UDP-glucose. Note the slight aberrant product migration of viscozyme-treated samples caused by the increased viscosity from the viscozyme solution.**

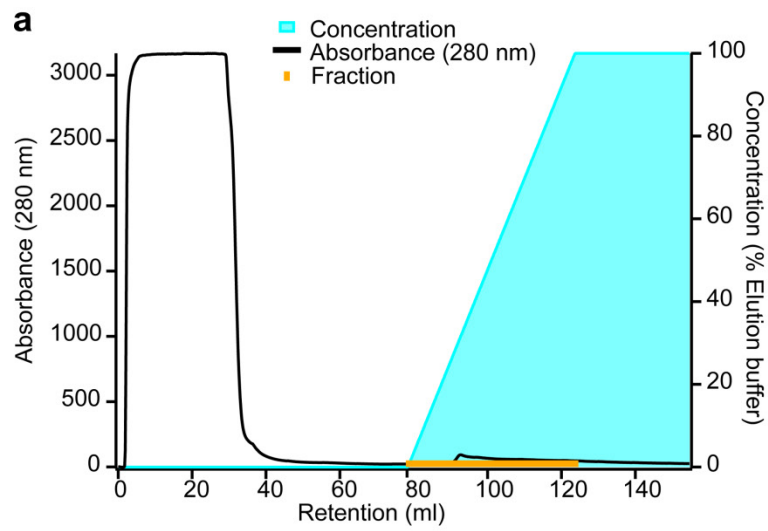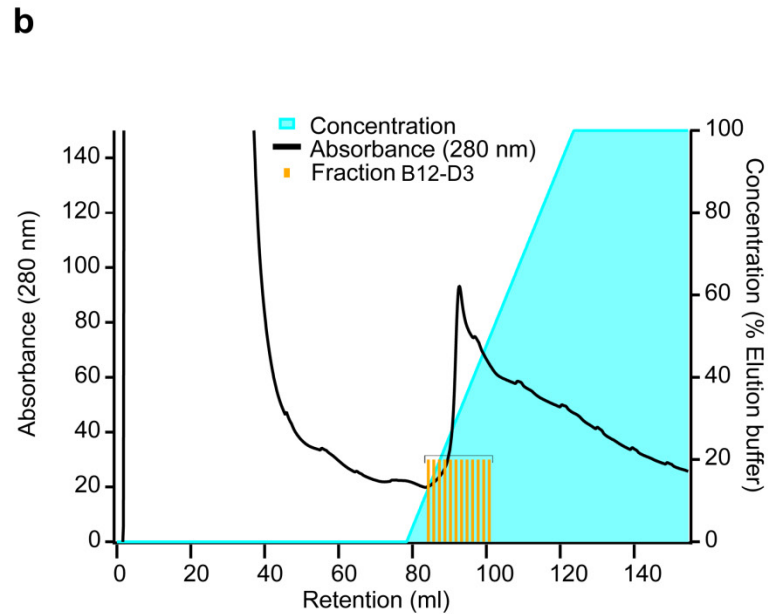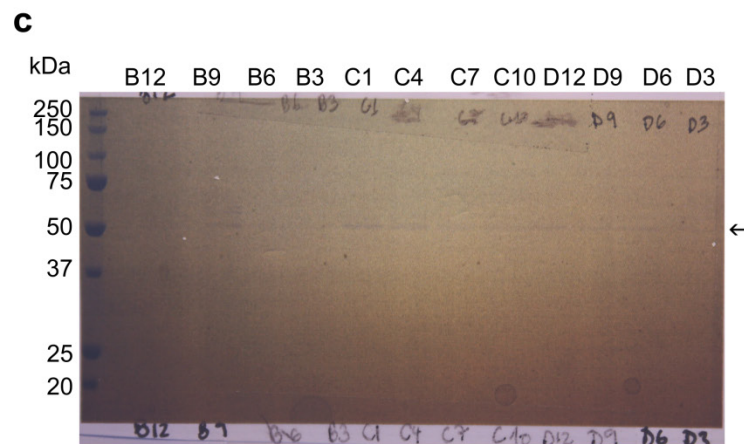

**Supplementary Figure 3 | Affinity purification of the DcUGT2-Strep protein** Yeast microsomes containing DcUGT2-Strep were solubilized with reduced Triton X-100 and DcUGT2 affinity purified by its Strep-tag II using a *Strep*-Tactin column. **a** The elution profile of DcUGT2-Strep as monitored by the protein absorbance at 280 nm. **b** The elution profile of DcUGT2-Strep as monitored by the protein absorbance at 280 nm. **c** The elution profile of DcUGT2-Strep as monitored by protein absorbance at 280 nm. The scale for absorbance at 280 nm has been adjusted compared to (a) to easily distinguish the fractions that were analyzed further. **c** Eluted protein fractions corresponding to the fractions indicated in (b) were separated on an SDS gel followed by Coomassie-staining. The arrow points to the position of DcUGT2-Strep.

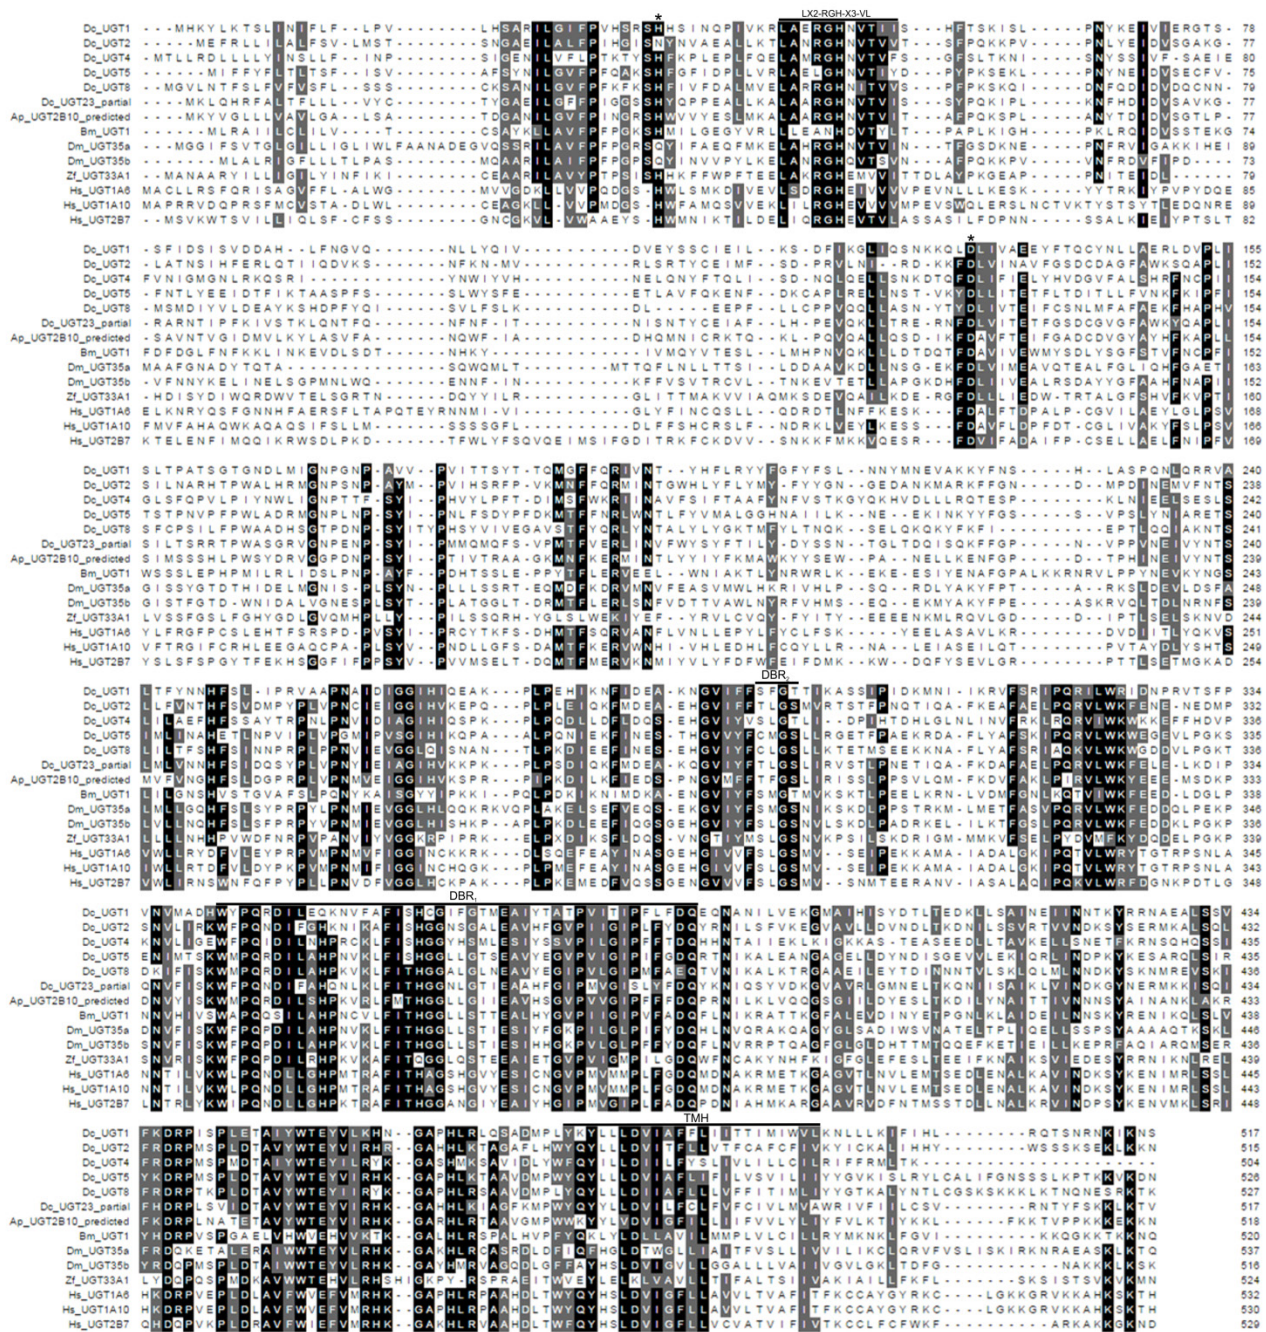

**Supplementary Figure 4 | Alignment of UGT amino acid sequences** Black and grey indicate identical and similar amino acids, respectively. Multiple sequence alignment was performed with MUSCLE<sup>1</sup> using the MEGA6 software. The alignment is composed of: DcUGT1, DcUGT2, DcUGT4, DcUGT5, DcUGT8 and the partial DcUGT23 from *D. coccus*; the predicted ApUGT2B10 from *A. pisum* (accession no.: XP001948117); BmUGT1 (accession no.: AF324465) from *Bombyx mori*; DmUGT35a (accession no.: AF116555) and DmUGT35b (accession no.: AF116554) from *Drosophila melanogaster*; ZfUGT33A1 (accession no.: GQ915324) from *Zygaena filipendulae*; HsUGT1A6 (accession no.: NM001072), HsUGT1A10 (accession no.: U89508) and HsUGT2B7 (accession no.: NM001074) from *Homo sapiens*. The motifs, “LX2-RGH-X3-VL”, “DBR1” and “DBR<sub>2</sub>”, are indicated as described in<sup>2,3</sup>. The predicted transmembrane helix (TMH) is given. Important catalytic residues are indicated with an asterisk according to<sup>2</sup>.

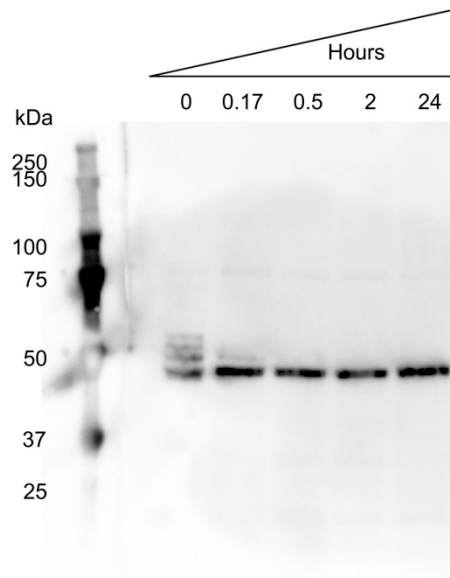

**Supplementary Figure 5 | Deglycosylation of truncated DcUGT2 $\Delta$ MD-Strep protein** Yeast microsomes containing DcUGT2 $\Delta$ MD-Strep were deglycosylated with glycanases for different periods of time: 0 min (0); 10 min (0.17); 30 min (0.5); 2 h (2) and 24 h (24). Proteins were separated on an SDS gel followed by western blotting using an anti-Strep antibody. Note that the anti-strep antibody reacts with the marker protein bands.

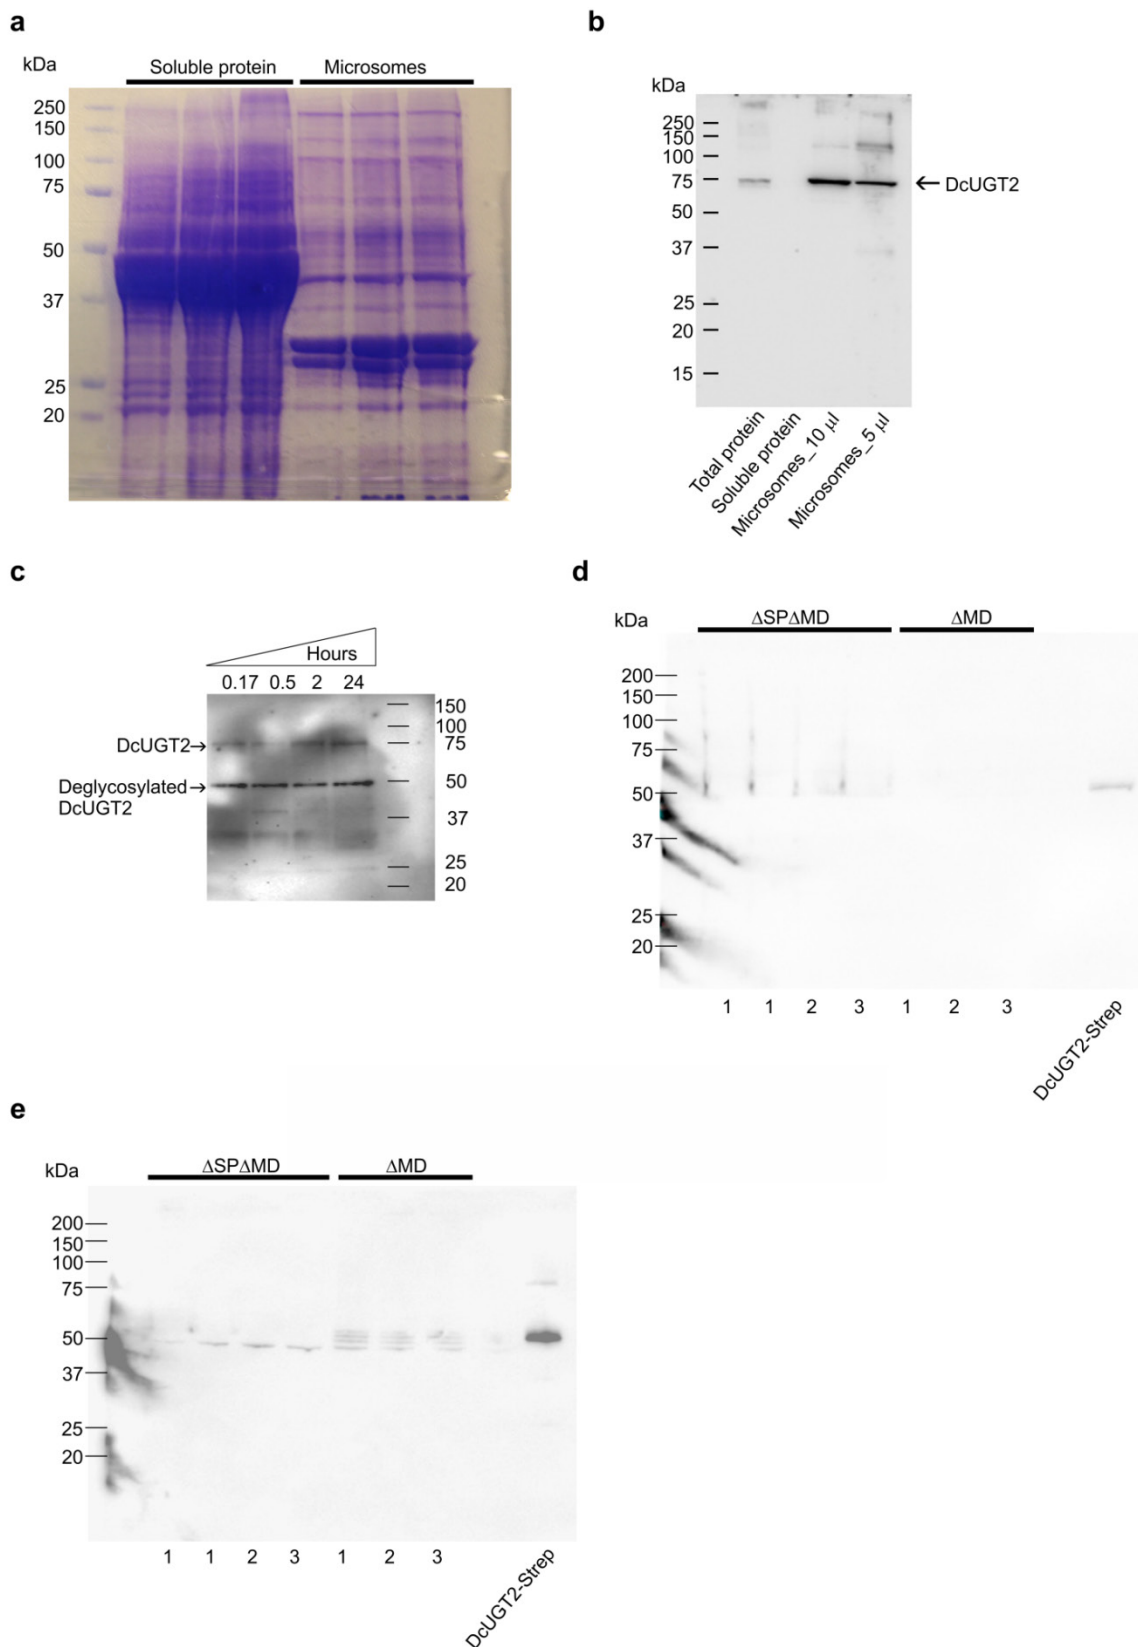

**Supplementary Figure 6 | Uncropped gel or blot images** Images displayed in cropped versions in the article. **a** Uncropped image of Fig. 2a: Coomassie-stained SDS gel of separated microsomal/soluble protein from *D. coccus*. **b** Uncropped image of Fig. 8a: Non-treated total protein, soluble protein and microsomes from *D. coccus*. Two different amounts of microsomes were loaded. **c** Uncropped image of Fig. 8b: *D. coccus* microsomes treated with glycanases for 10 min (0.17); 30 min (0.5); 2 h (2) and 24 h (24). **d** Uncropped image of Fig. 9a: Soluble protein from three individual *S. cerevisiae* transformants expressing either  $\Delta SP$ -DcUGT2 $\Delta MD$ -Strep ( $\Delta SP\Delta MD$ ) or DcUGT2 $\Delta MD$ -Strep ( $\Delta MD$ ) were analyzed by western blotting. Transformant 1 expressing  $\Delta SP$ -DcUGT2 $\Delta MD$ -Strep was loaded twice. Yeast microsomes, containing the full-length DcUGT2-Strep, were used as an additional size marker control. **e** Uncropped image of Fig. 9b: Microsomal protein from three individual *S. cerevisiae* transformants expressing either  $\Delta SP$ -DcUGT2 $\Delta MD$ -Strep ( $\Delta SP\Delta MD$ ) or DcUGT2 $\Delta MD$ -Strep ( $\Delta MD$ ) were analyzed by western blotting. Transformant 1 expressing  $\Delta SP$ -DcUGT2 $\Delta MD$ -Strep was loaded twice. Yeast microsomes, containing the full-length DcUGT2-Strep, were used as an additional size marker control.

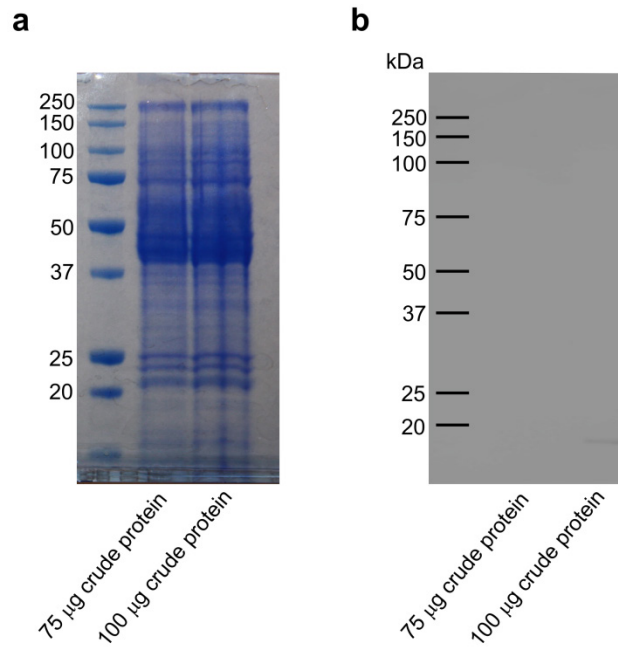

**Supplementary Figure 7 | Rabbit pre-immune serum test** The pre-immune serum of the rabbit, used to produce anti-DcUGT2 antibodies, was tested for cross-reactivity towards a crude *D. coccus* protein extract. The test was carried out on two amounts (75 µg and 100 µg) of crude protein. **a** Coomassie-stained SDS gel of separated crude *D. coccus* proteins. **b** Western blot analysis of crude *D. coccus* proteins probed with rabbit pre-immune serum (1:1000 dilution), followed by incubation with secondary HRP-conjugated antibodies and chemiluminescence detection.

### Supplementary References

- 1 Edgar, R. C. MUSCLE: multiple sequence alignment with high accuracy and high throughput. *Nucleic Acids Research* **32**, 1792-1797, doi:10.1093/nar/gkh340 (2004).
- 2 Radomska-Pandya, A., Bratton, S. M., Redinbo, M. R. & Miley, M. J. The crystal structure of human UDP-glucuronosyltransferase 2B7 C-terminal end is the first mammalian UGT target to be revealed: the significance for human UGTs from both the 1A and 2B families. *Drug Metab. Rev.* **42**, 133-144 (2010).
- 3 Senay, C. *et al.* The importance of cysteine 126 in the human liver UDP-glucuronosyltransferase UGT1A6. *Biochim. Biophys. Acta, Protein Struct. Mol. Enzymol.* **1597**, 90-96 (2002).
