# Supplementary material for: Characterization of a membrane-bound C-glucosyltransferase responsible for carminic acid biosynthesis in Dactylopius coccus Costa
Source: PubMed Central journal article supplement (PMC5719414; doi:10.1038/s41467-017-02031-z), 2017-12-07
Supplement: 41467_2017_2031_MOESM3_ESM.pdf [file 41467_2017_2031_MOESM3_ESM.pdf]

## Description of Additional Supplementary Files

File Name: Supplementary Data 1

Description: **List of putative UDP-glycosyltransferase (UGT) candidate transcripts in *Dactylopius coccus*.** UGT candidates were identified based on Pfam annotation and protein homology BLAST analyses. Note that only the transcripts of *DcUGT2*, *DcUGT5* and *DcUGT5* have been verified by RACE. Several of the transcripts might therefore be partial.

File Name: Supplementary Data 2

Description: **Identification of proteins in the *Dactylopius coccus* proteome (protein level, 50-70 kDa region) by searching the *de novo*-assembled *D. coccus* transcriptome database.** Note that “amino acid sequence of the translated verified or predicted ORF” refers to amino acid sequence of the *D. coccus* protein identified based on the *de novo*-assembled transcriptome. Transcript sequences could be partial and have not been verified by RACE (except for *DcUGT2*, *DcUGT4* and *DcUGT5*).

File Name: Supplementary Data 3

Description: **MASCOT generic peak-list file.** The MASCOT generic peak-list file was generated by the Proteome Discoverer software and used to identify proteins in MASCOT searches.
